# Supplementary material for: Complexes of In(iii) with 8-hydroxyquinoline-5-sulfonate in solution: structural studies and the effect of cationic surfactants on the photophysical behaviour
Source: Royal Society of Chemistry journal article supplement (doi:10.1039/d1dt02858h), 2021-01-01
Supplement: d1dt02858h1.pdf [file d1dt02858h1.pdf]

## Electronic supplementary information (ESI)

### Complexes of In(III) with 8-hydroxyquinoline-5-sulfonate in solution: Structural studies and the effect of cationic surfactants on the photophysical behaviour

M. Luísa Ramos\*, Licínia L. G. Justino, Rui Barata, Telma Costa, Hugh D. Burrows

*Chemistry Department and Coimbra Chemistry Centre, University of Coimbra, 3004-535 Coimbra, Portugal. E-mail: mlramos@ci.uc.pt; Fax: +351-239-827703; Tel: +351-239-854453*

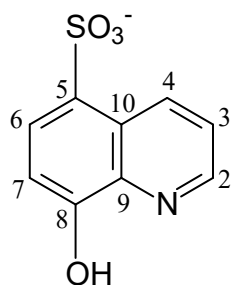

8-HQS

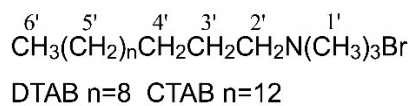

DTAB / CTAB

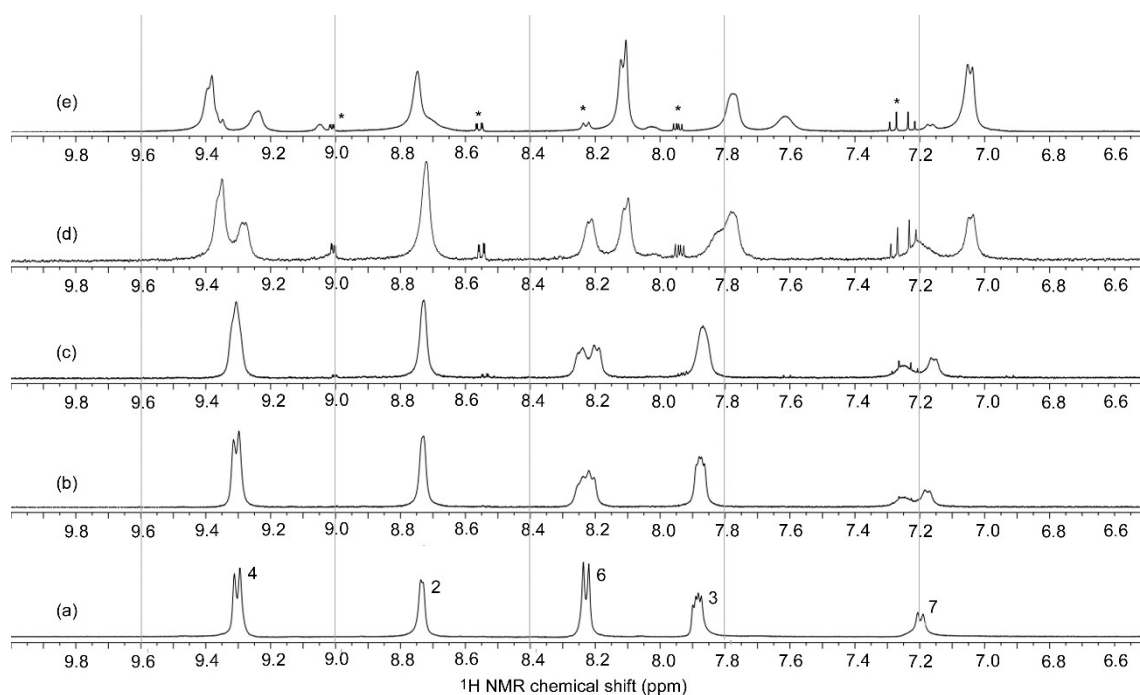

**Fig. S1.** Expansion 6.5-10 ppm of the  $^1\text{H}$  NMR spectra of  $\text{D}_2\text{O}$  solutions of (a)  $\text{In}^{3+}/8\text{-HQS}$  2.5 : 7.5  $\text{mmol dm}^{-3}$ , pH 4.25, (b)  $\text{In}^{3+}/8\text{-HQS}/\text{CTAB}$  2.5 : 7.5 : 0.5  $\text{mmol dm}^{-3}$ , (c)  $\text{In}^{3+}/8\text{-HQS}/\text{CTAB}$  2.5 : 7.5 : 1.0  $\text{mmol dm}^{-3}$  (d)  $\text{In}^{3+}/8\text{-HQS}/\text{CTAB}$  2.5 : 7.5 : 5.0  $\text{mmol dm}^{-3}$  (e)  $\text{In}^{3+}/8\text{-HQS}/\text{CTAB}$  2.5 : 7.5 : 10  $\text{mmol dm}^{-3}$ , temp. 298 K. \*8-HQS ligand signals.

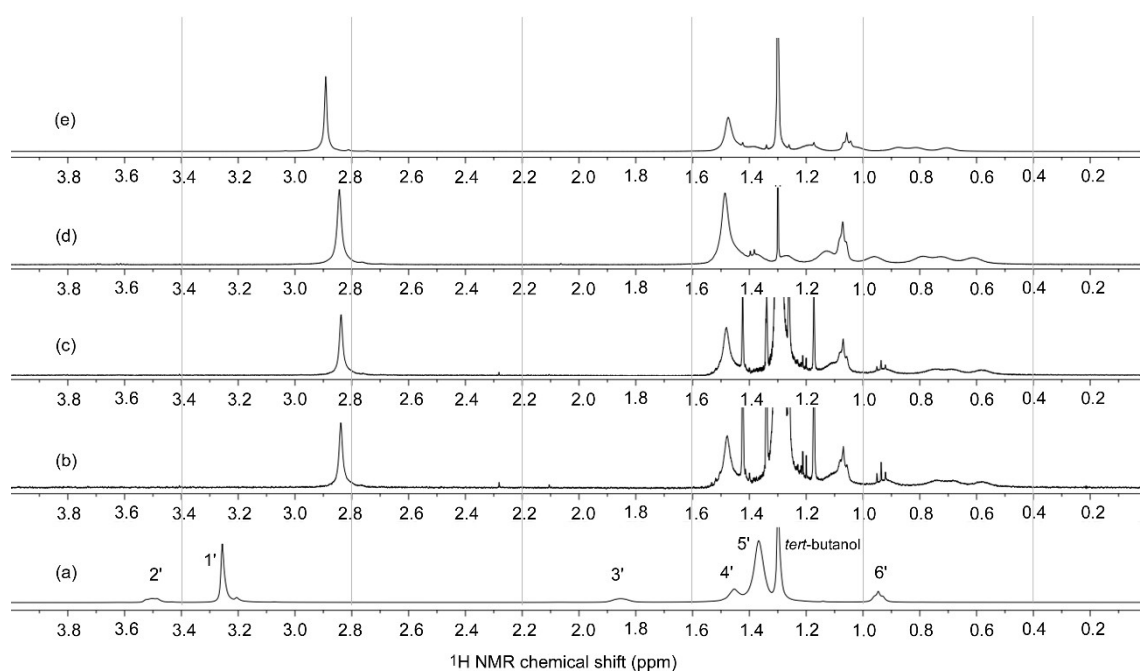

**Fig. S2.** Expansion 0-4 ppm of the  $^1\text{H}$  NMR spectra of  $\text{D}_2\text{O}$  solutions of (a) CTAB 10  $\text{mmol dm}^{-3}$ , pH\* 6.87, (b)  $\text{In}^{3+}/8\text{-HQS}/\text{CTAB}$  2.5:7.5:0.5  $\text{mmol dm}^{-3}$ , (c)  $\text{In}^{3+}/8\text{-HQS}/\text{CTAB}$  2.5:7.5:1  $\text{mmol dm}^{-3}$ , (d)  $\text{In}^{3+}/8\text{-HQS}/\text{CTAB}$  2.5:7.5:5  $\text{mmol dm}^{-3}$  and (e)  $\text{In}^{3+}/8\text{-HQS}/\text{CTAB}$  2.5:7.5:10  $\text{mmol dm}^{-3}$ , temp. 298 K.

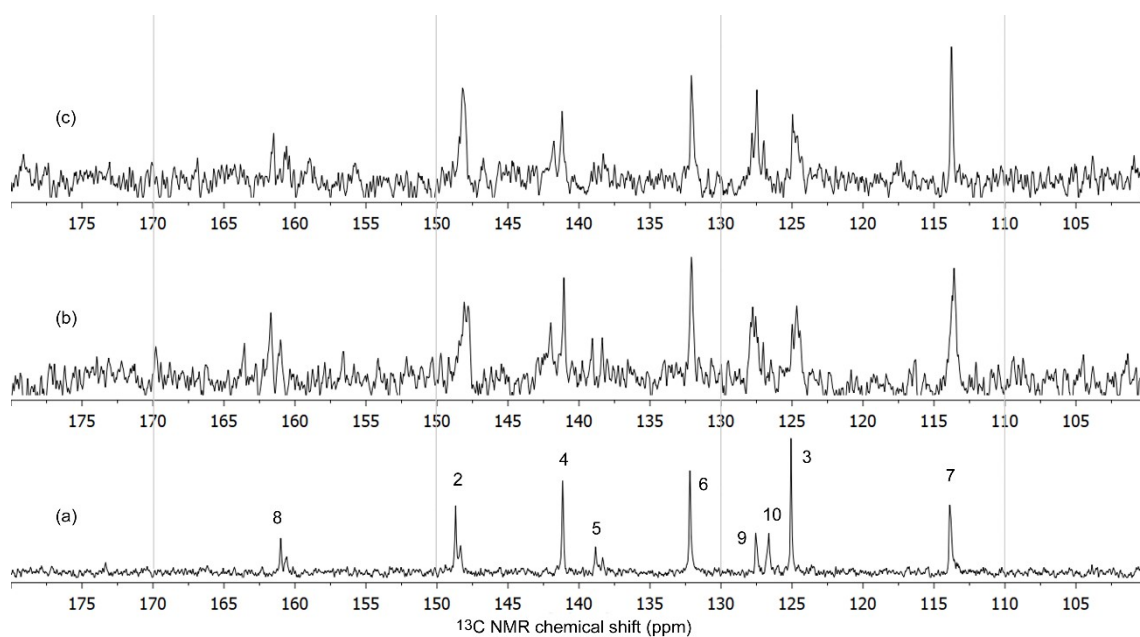

**Fig. S3.** Expansion 100-180 ppm of the  $^{13}\text{C}$  NMR spectra of  $\text{D}_2\text{O}$  solutions of (a)  $\text{In}^{3+}/8\text{-HQS}$  2.5 : 7.5  $\text{mmol dm}^{-3}$ , pH 4.25, (b)  $\text{In}^{3+}/8\text{-HQS}/\text{DTAB}$  2.5 : 7.5 : 2.0  $\text{mmol dm}^{-3}$ , (c)  $\text{In}^{3+}/8\text{-HQS}/\text{DTAB}$  2.5 : 7.5 : 20  $\text{mmol dm}^{-3}$ , temp. 298 K.

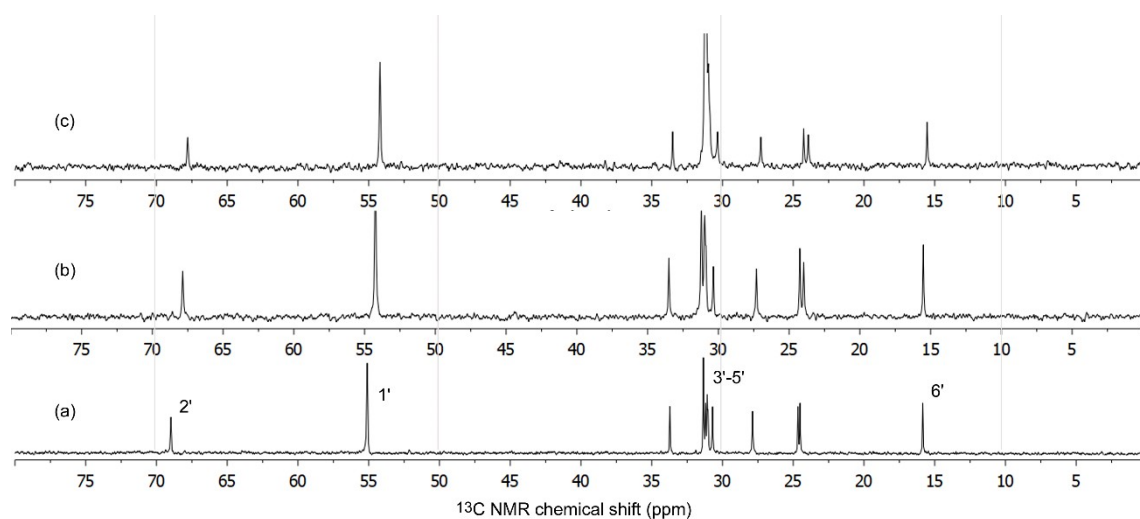

**Fig. S4.** Expansion 0-80 ppm of the  $^{13}\text{C}$  NMR spectra of solutions in  $\text{D}_2\text{O}$  of (a) DTAB 20  $\text{mmol dm}^{-3}$ , pH 6.04, (b)  $\text{In}^{3+}/8\text{-HQS}/\text{DTAB}$  2.5 : 7.5 : 2.0  $\text{mmol dm}^{-3}$  (c)  $\text{In}^{3+}/8\text{-HQS}/\text{DTAB}$  2.5 : 7.5 : 20  $\text{mmol dm}^{-3}$ , temp. 298 K.

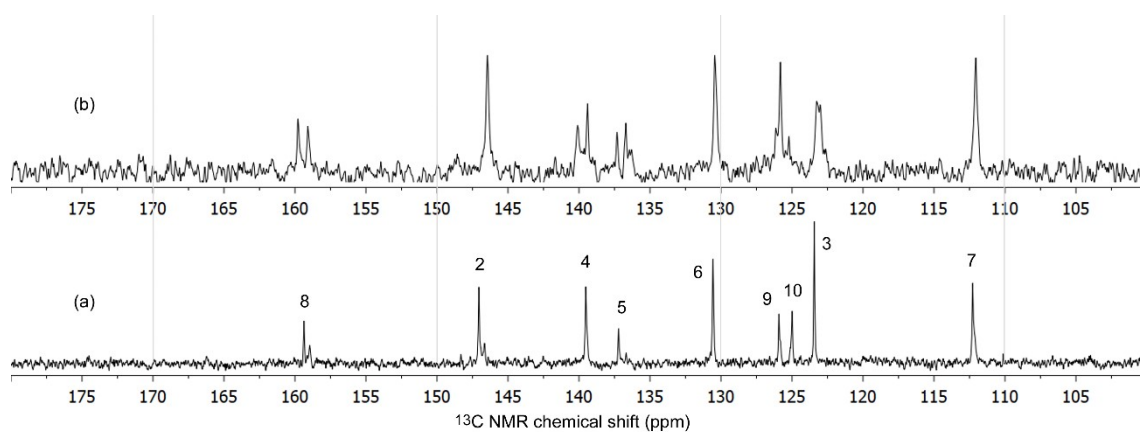

**Fig. S5.** Expansion 100-180 ppm of the  $^{13}\text{C}$  NMR spectra of  $\text{D}_2\text{O}$  solutions of (a)  $\text{In}^{3+}/8\text{-HQS}$  2.5:7.5  $\text{mmol dm}^{-3}$ , pH 4.25 (b)  $\text{In}^{3+}/8\text{-HQS}/\text{CTAB}$  5:10:5.0  $\text{mmol dm}^{-3}$ , temp. 298 K.

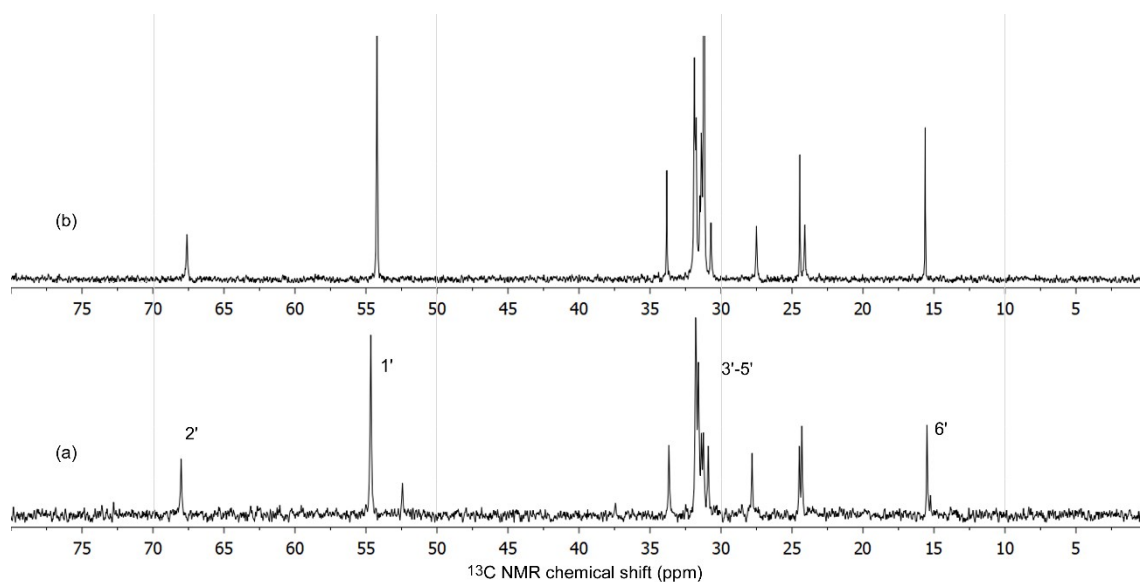

**Fig. S6.** Expansion 0-80 ppm of the  $^{13}\text{C}$  NMR spectra of solutions in  $\text{D}_2\text{O}$  of (a) CTAB 10  $\text{mmol dm}^{-3}$ , pH 6.87, (b)  $\text{In}^{3+}/8\text{-HQS}/\text{CTAB}$  2.5 : 7.5 : 10  $\text{mmol dm}^{-3}$ , temp. 298 K.

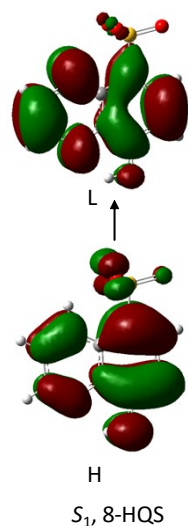

**Fig. S7.** Main excitation contributing to the lowest energy singlet,  $S_1$ , electronic excited states of the ligand **8-HQS** calculated by TD-DFT with the CAM-B3LYP functional.

**Table S1.**  $^1\text{H}$  NMR chemical shifts <sup>a)</sup> of CTAB and DTAB as function of their concentrations in solutions of  $\text{In}^{3+}/8\text{-HQS}$

|                                                             | H-1' | H-2' | H-3' | H-4' | H-5'                    | H-6' |
|-------------------------------------------------------------|------|------|------|------|-------------------------|------|
| <b>CTAB</b>                                                 | 3.24 | 3.50 | 1.86 | 1.45 | 1.37                    | 0.95 |
| <b><math>\text{In}^{3+}/8\text{-HQS}/\text{CTAB}</math></b> |      |      |      |      |                         |      |
| 2.5:7.5:0.5 mmol dm <sup>-3</sup>                           | 2.83 | - b) | - c) | 1.48 | 1.07 c)                 | 1.07 |
| 2.5:7.5:1.0 mmol dm <sup>-3</sup>                           | 2.84 | - b) | - c) | 1.48 | 1.06 c)                 | 1.07 |
| 2.5:7.5:5.0 mmol dm <sup>-3</sup>                           | 2.85 | - b) | - c) | 1.49 | 0.95/0.79/<br>0.72/0.62 | 1.05 |
| 2.5:7.5:10 mmol dm <sup>-3</sup>                            | 2.88 | - b) | - c) | 1.47 | 0.87/0.81/<br>0.70      | 1.06 |
| <b>DTAB</b>                                                 | 3.24 | 3.48 | 1.85 | 1.45 | 1.36                    | 0.95 |
| <b><math>\text{In}^{3+}/8\text{-HQS}/\text{DTAB}</math></b> |      |      |      |      |                         |      |
| 2.5:7.5:1.0 mmol dm <sup>-3</sup>                           | 3.12 | 3.25 | 1.65 | - d) | 1.11/1.04/<br>0.94/0.89 | 0.85 |
| 2.5:7.5:5.0 mmol dm <sup>-3</sup>                           | 3.02 | 3.08 | 1.47 | - d) |                         | 0.97 |
| 2.5:7.5:10 mmol dm <sup>-3</sup>                            | 2.94 | 2.99 | 1.44 | 1.36 | 1.12/1.00/<br>0.89/0.80 | 1.04 |
| 2.5:7.5:20 mmol dm <sup>-3</sup>                            | 2.93 | 2.97 | 1.43 | 1.36 | 1.12/0.99/<br>0.85/0.78 | 1.04 |

- a)  $\delta$  Values, in ppm, in ppm, relative to  $\text{Me}_4\text{Si}$ , using *tert*-butyl alcohol ( $\delta_{\text{H}}=1.3$ ) as internal reference.  
b) superimposed with the signal of H-1'.  
c) broad.  
d) superimposed with the signal of the reference.
